# Supplementary material for: Protein and microRNA biomarkers from lavage, urine, and serum in military personnel evaluated for dyspnea
Source: PubMed Central journal article supplement (PMC4193960; doi:10.1186/1755-8794-7-58), 2014-10-05

Normal Q-Q Plot of Lung Fluid Samples

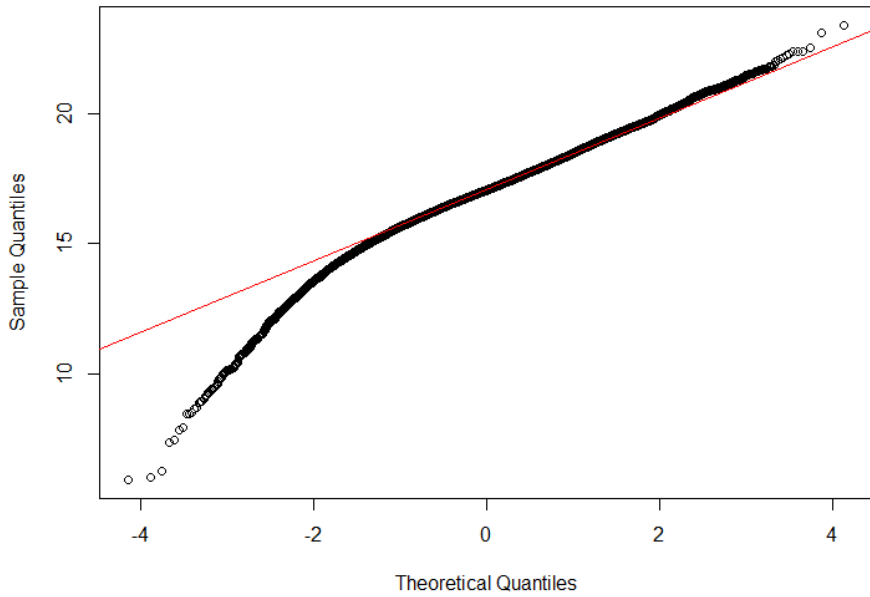

Additional file 15

Lung Fluid Control protein abundance %CVs

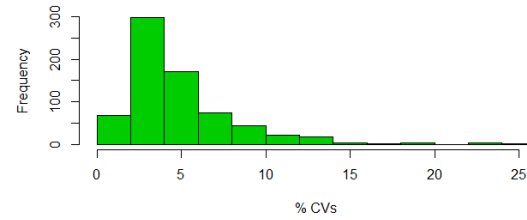

Lung Fluid Dyspnea protein abundance %CVs

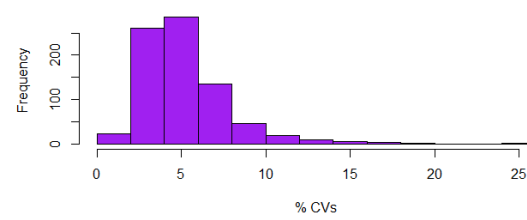

Normal Q-Q Plot

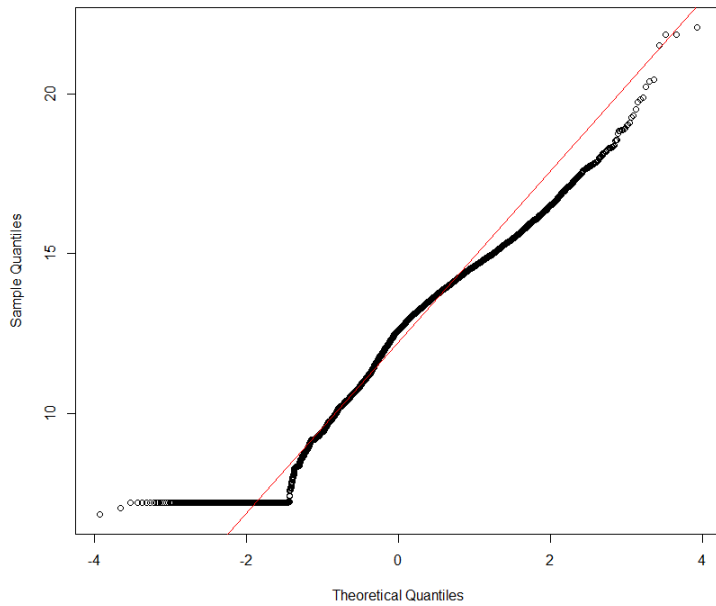

Urine Control protein abundance %CVs

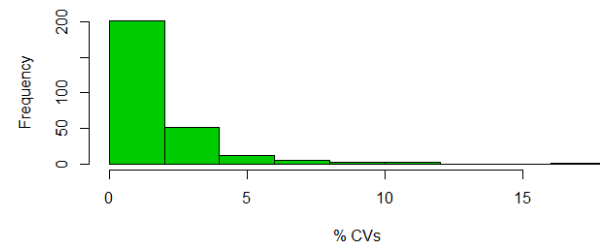

Urine Dyspnea protein abundance %CVs

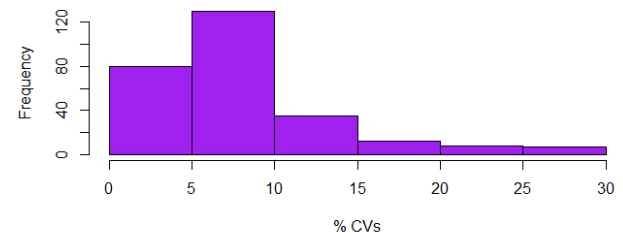

Supplement: 1755-8794-7-58-S4.pdf [file 1755-8794-7-58-S4.pdf]
