# Supplementary material for: Protein and microRNA biomarkers from lavage, urine, and serum in military personnel evaluated for dyspnea
Source: PubMed Central journal article supplement (PMC4193960; doi:10.1186/1755-8794-7-58), 2014-10-05

hsa-miR-187-3p

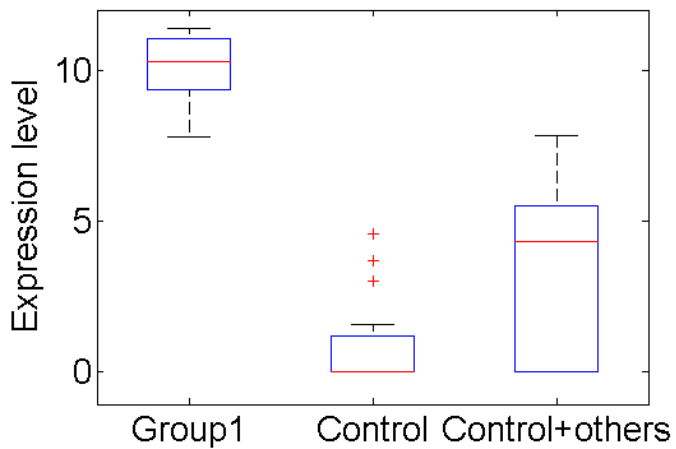

hsa-miR-371a-5p

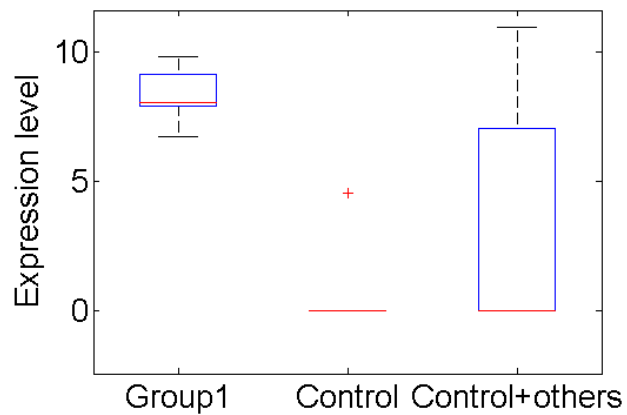

hsa-miR-421

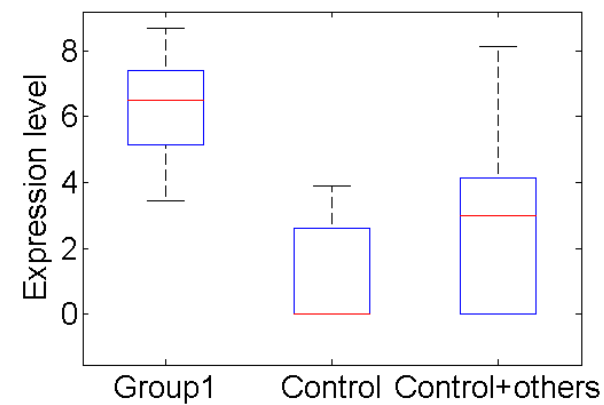

hsa-miR-1915-3p

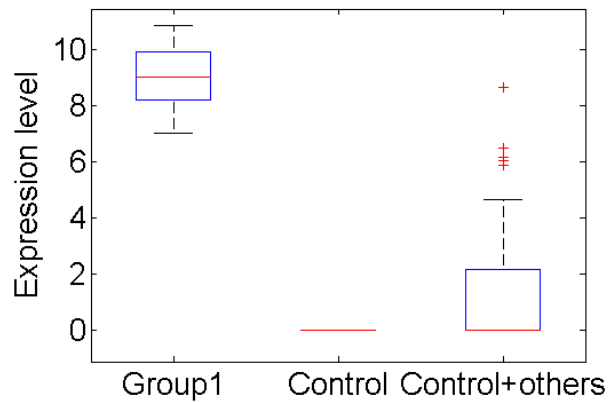

hsa-miR-4488

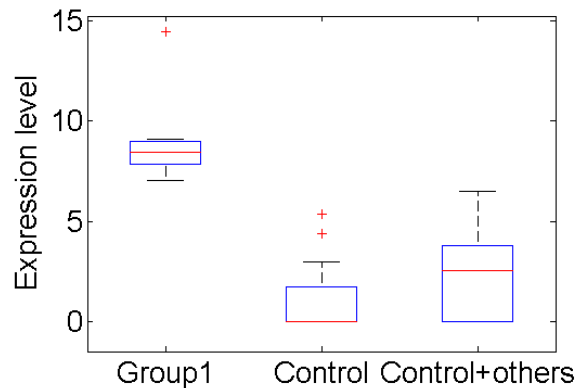

Supplement: 1755-8794-7-58-S11.pdf [file 1755-8794-7-58-S11.pdf]
