# Supplementary material for: Protein and microRNA biomarkers from lavage, urine, and serum in military personnel evaluated for dyspnea
Source: PubMed Central journal article supplement (PMC4193960; doi:10.1186/1755-8794-7-58), 2014-10-05

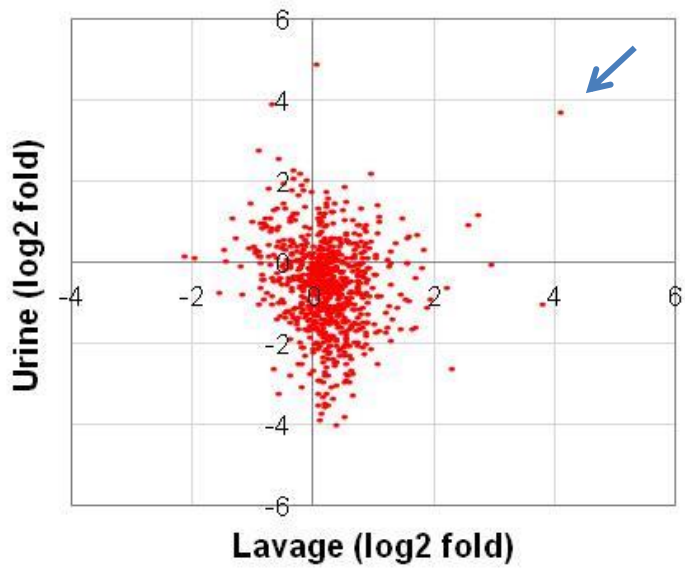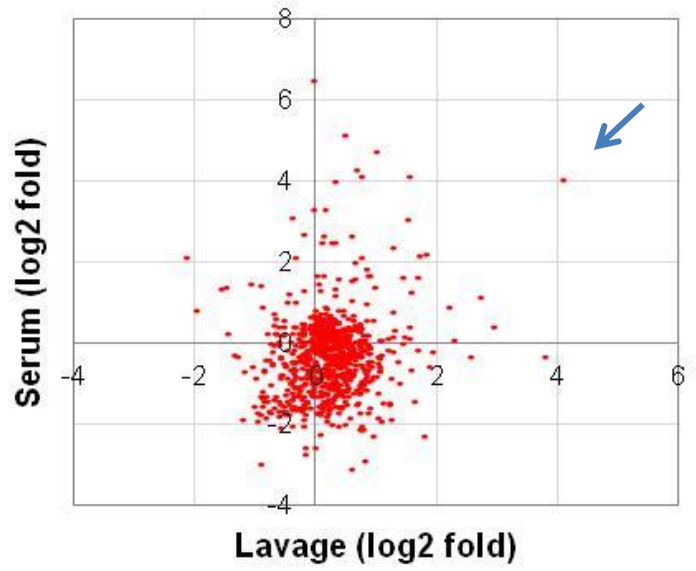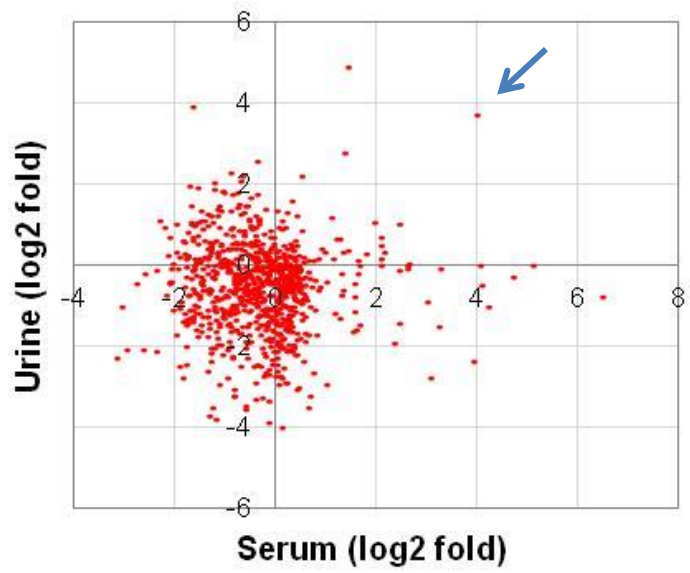

Supplement: 1755-8794-7-58-S14.pdf [file 1755-8794-7-58-S14.pdf]
